# Supplementary material for: Extensive Variation in Gene Copy Number at the Killer Immunoglobulin-Like Receptor Locus in Humans
Source: PubMed Central journal article supplement (PMC3695908; doi:10.1371/journal.pone.0067619), 2013-06-28
Supplement: pone.0067619.s001.pdf [file pone.0067619.s001.pdf]

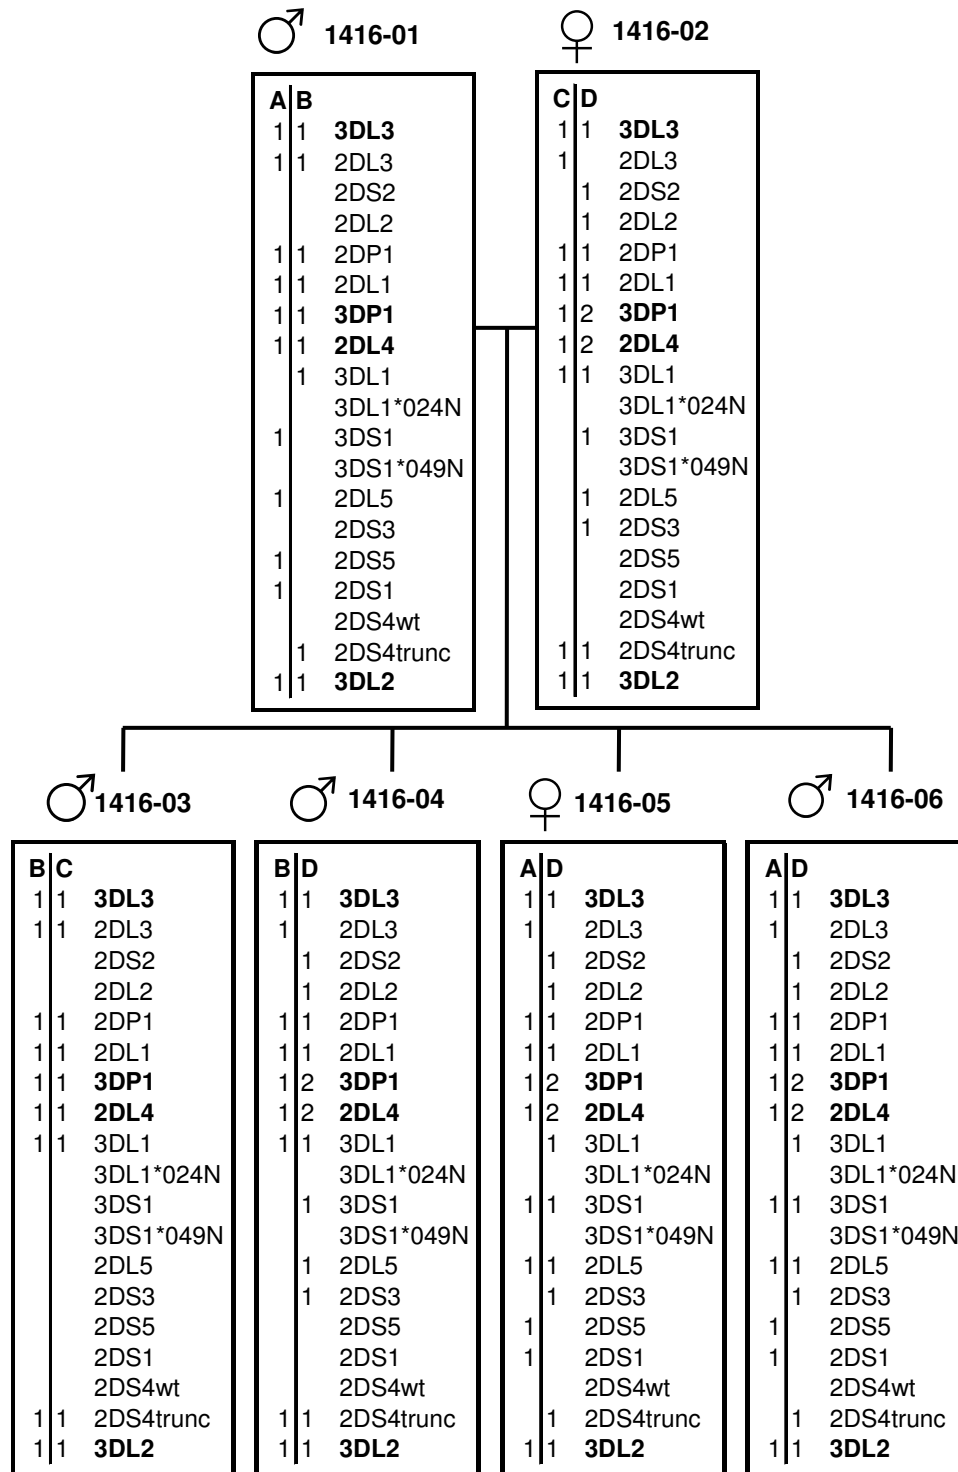

**Figure S1**

KIR gene pedigree analysis of a Centre d'Etude du Polymorphisme Humaine family by KIR MLPA. The mother of family 1416 has a duplication of two KIR genes on allele D, which was transferred to three of her genotyped children.
