# Supplementary material for: Extensive Variation in Gene Copy Number at the Killer Immunoglobulin-Like Receptor Locus in Humans
Source: PubMed Central journal article supplement (PMC3695908; doi:10.1371/journal.pone.0067619), 2013-06-28
Supplement: pone.0067619.s002.pdf [file pone.0067619.s002.pdf]

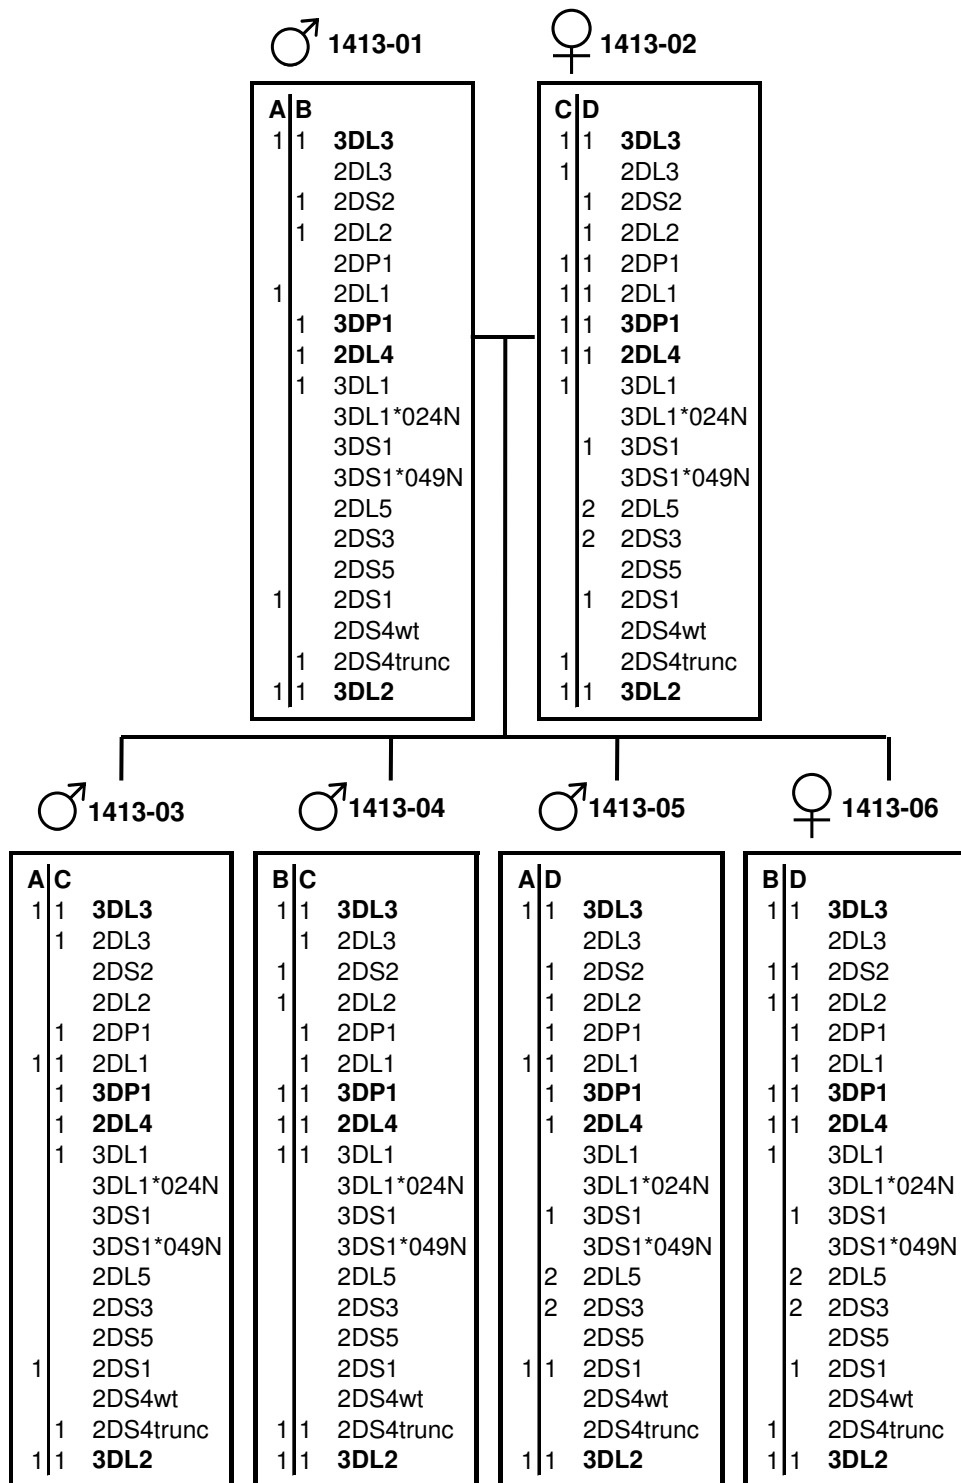

**Figure S2**

KIR gene pedigree analysis of a Centre d'Etude du Polymorphisme Humaine family by KIR MLPA. The father of family 1413 has only one copy of both *KIR2DL4* and *KIR3DP1*, which can be traced back to some of his children.
