# Supplementary material for: Extensive Variation in Gene Copy Number at the Killer Immunoglobulin-Like Receptor Locus in Humans
Source: PubMed Central journal article supplement (PMC3695908; doi:10.1371/journal.pone.0067619), 2013-06-28
Supplement: pone.0067619.s003.pdf [file pone.0067619.s003.pdf]

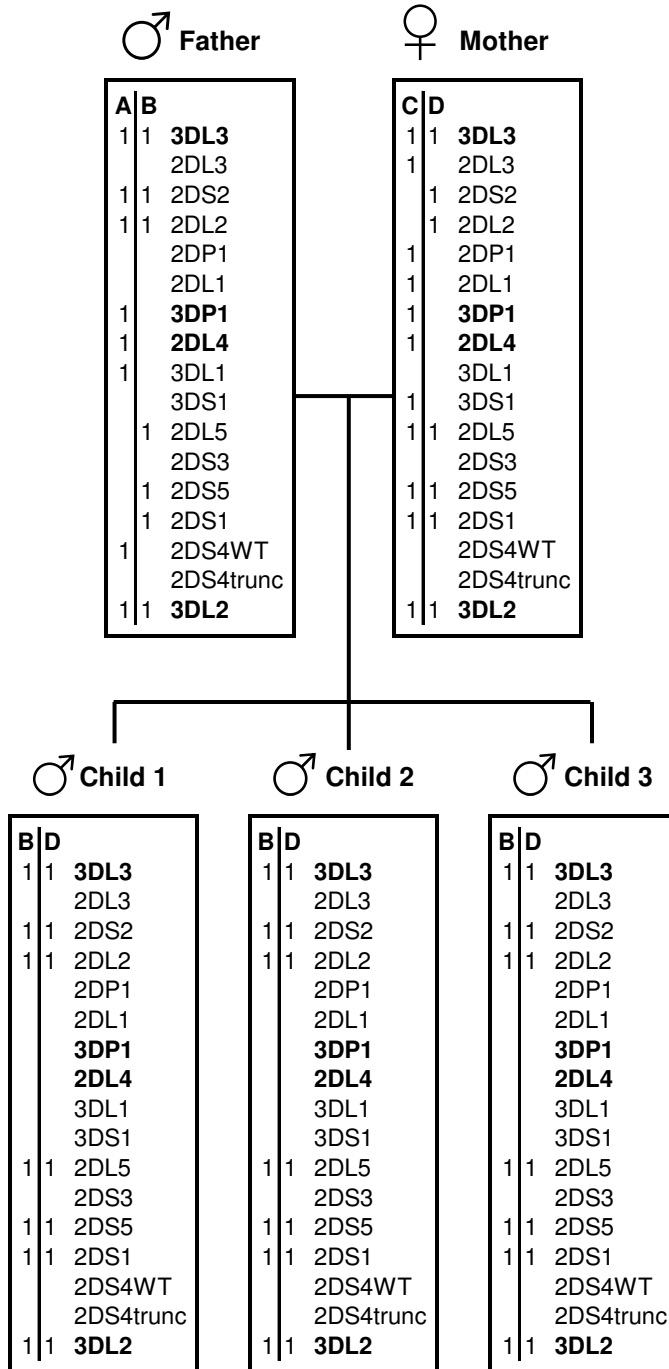

**Figure S3**

KIR gene pedigree analysis of an Israeli family by KIR MLPA. Both parents carry only one copy of the framework genes *KIR3DP1* and *KIR2DL4*, which results in a complete absence of those genes in all three children.
