# Supplementary material for: Extensive Variation in Gene Copy Number at the Killer Immunoglobulin-Like Receptor Locus in Humans
Source: PubMed Central journal article supplement (PMC3695908; doi:10.1371/journal.pone.0067619), 2013-06-28
Supplement: pone.0067619.s005.pdf [file pone.0067619.s005.pdf]

**Table S1**  
**Overview probe sequences of the KIR MLPA technique.**

| Probe            | Sequence (5'-3')                                                                 |
|------------------|----------------------------------------------------------------------------------|
| 2DL1 - #1 left   | GGGTTCCCTAAGGGTTGGACTACCCCATCGCTCTTCATGCTGGATCATTCACTCTGCATCCCAATGACAATG         |
| 2DL1 - #1 middle | AGAAGAAAGTCTGGACACTCTCACCTATGATCACGATGTCAGAGGGTCACTGGGAGCTGACAC                  |
| 2DL1 - #1 right  | CTGATAGGGGGAGTGAGTAACAGAACCGTAGTCTAGATTGGATCTTGCTGGCAC                           |
| 2DL1 - #2 left   | GGGTTCCCTAAGGGTTGGACATCCTGTGCGCTGCTGAGCTGAGCTCG                                  |
| 2DL1 - #2 right  | GTGCGGGCTGCCTGTCTGCTCCGGCAGTCTAGATTGGATCTTGCTGGCAC                               |
| 2DL2 - #1 left   | GGGTTCCCTAAGGGTTGGACTGACCTTGGGCCCTGCAGAGAACCCTACA                                |
| 2DL2 - #1 right  | TTCATGGGCCTCCCCCTCCCTGGATGTCTAGATTGGATCTTGCTGGCAC                                |
| 2DL2 - #2 left   | GGGTTCCCTAAGGGTTGGACATGTCTATGATCCTAGAGCCTTAGCTGAGGAGCTTCTGCTGATGATGGAGAT         |
| 2DL2 - #2 right  | AAGCATGGACAGATGCAGAGAGAAGACGAAGCTTGGGTGTGAGGGAGGTCTAGATTGGATCTTGCTGGCAC          |
| 2DL3 - #1 left   | GGGTTCCCTAAGGGTTGGACYRCACAGTTGRATCACTGCGTTTTACACAGAGAAAAATCACTCRCCCTT            |
| 2DL3 - #1 middle | CTCAGAGGCCAAGACACCCCCAACAGATATCATCGTGTACACGGAACTTCCAAATGCTGAGCCCT                |
| 2DL3 - #1 right  | GATCCAAAGTTGTCTCCTGCCATGAGCACCACAGTCAGGCCTTGTCTAGATTGGATCTTGCTGGCAC              |
| 2DL3 - #2 left   | GGGTTCCCTAAGGGTTGGACTGCTGCCTTGGGCCAGGGACCATCCTGTCTGTGAGGAACACACACCTGAGTGCTC      |
| 2DL3 - #2 middle | CCATCCTGCTTCCCACATGGCCCTGAGCTCTCTGGCCTCTGCTTCGTGAGACTTACTTTTTTTGTTGC             |
| 2DL3 - #2 right  | AGCACCAGCGATGAAGGAGAAAGAAGAGGAGGAGGATGAAGAGGATGTCTAGATTGGATCTTGCTGGCAC           |
| 2DL4 - #1 left   | GGGTTCCCTAAGGGTTGGACCTGCTTCAGAACATGGCTCTCTGCTGGGGAGACACCCAA                      |
| 2DL4 - #1 middle | TCTGCAGGCCATAGTGAACCCTGGTGTCTCCTTCCCTTCCAGGACTCACCAAG                            |
| 2DL4 - #1 right  | ACATGCCAGGATGATGACCGTGGGTGACATGGAGTCTAGATTGGATCTTGCTGGCAC                        |
| 2DL4 - #2 left   | GGGTTCCCTAAGGGTTGGACCCGCTTAGAAAGAAGAAATGGGGAGAATCTTCTGAGCACAGGGAGGGAGGGGC        |
| 2DL4 - #2 middle | AGCTCAACATACTCCTCTCTGAGGCGGCATCTCCTTCTCCCAAGGTGGTCAGGACAAGCCCTTCTGC              |
| 2DL4 - #2 right  | TCTGCCTGGCCCAGCGCTGTGGTGCCTCAAGGAGGACACGTGACTTTCGGTGGTCTAGATTGGATCTTGCTGGCAC     |
| 2DL5 - #1 left   | GGGTTCCCTAAGGGTTGGACTCAGGTGTGAGGGGAGCTGTGACAAGGAAGAACCCTCC                       |
| 2DL5 - #1 middle | CTGAGGAAACTGCCTCTTCTTCCAGGTCTATT                                                 |
| 2DL5 - #1 right  | TGGGAAACCTTCACTCTCAGCCCAGCCGGTCTAGATTGGATCTTGCTGGCGC                             |
| 2DL5 - #2 left   | GGGTTCCCTAAGGGTTGGACCGACCTACACATGCTTYRGCTCTCTCCATGACTC                           |
| 2DL5 - #2 right  | ACCCTATGAGTGGTCAGACCCGAGTGACCCGTCTAGATTGGATCTTGCTGGCAC                           |
| 2DL5b left       | GGGTTCCCTAAGGGTTGGACATGTTAGCACAGATTTTAGGCATCTCGTGTTCGGATAAAAATACATGAAAAGTCTTTCAC |
| 2DL5b middle     | GTTAGCACAGATTTTAGGCATCTTGTTTCGGGAGGTTGGATCTGAGACGTGTTGTGAGTTGGTCATAGTGAAGGACGT   |
| 2DL5b right      | GAGGTGCCAATTCTAGTGAACAATTTCCAGGAAGCCGTGTTCCGGTCTAGATTGGATCTTGCTGGCAC             |
| 2DP1 - #1 left   | GGGTTCCCTAAGGGTTGGACCCAAGGTGGTCAGGACAAGCCCTTCTGCTGCCTGGCCCAGCTC                  |
| 2DP1 - #1 right  | TGTGGTGCCTCCAGGACATGTGATTCTTCCGGTGTCTAGATTGGATCTTGCTGGCGC                        |
| 2DP1 - #2 left   | GGGTTCCCTAAGGGTTGGACCAGGGACCTACAGATGCTACGGTCTGTTACTCACTCCCC                      |
| 2DP1 - #2 right  | CATCAGTTGTAGCTCCCAGTGACCCTCTGGACATCGTCTAGATTGGATCTTGCTGGCAC                      |
| 2DS1 - #1 left   | GGGTTCCCTAAGGGTTGGACACAGGGCCCATGAAAAGGCTGTTCCAGAATATTATGTTGTAGAGCTCAGGGACAGGCA   |
| 2DS1 - #1 middle | CCCCATCTTCTTTACAGACTGAAGTTGTTAAACCAAGATAAGAATGACACTGAAGAATCACATA                 |
| 2DS1 - #1 right  | TCCTGGAGGCACCACAGGGCTTGGCCAGTCTAGATTGGATCTTGCTGGCAC                              |
| 2DS1 - #2 left   | GGGTTCCCTAAGGGTTGGACTAGGAGACCGTGGAAAAGGCAATCCCGA                                 |
| 2DS1 - #2 middle | CCCCTGGTGAATGTGGTGTCTGATTTT                                                      |
| 2DS1 - #2 right  | GACACTAAGTGGATGAAGCAGATGGATATAAGCGTCTAGATTGGATCTTGCTGGCAC                        |
| 2DS2 left        | GGGTTCCCTAAGGGTTGGACCCGGCCGAGCACCCAGGGTCTCTTCCC                                  |
| 2DS2 right       | AGTTTATGAGAGACTCCCTGACAGGACGTCTAGATTGGATCTTGCTGGCAC                              |
| 2DS3 - #1 left   | GGGTTCCCTACGGGTTGGACCATCACGATGTCCAGAGGGTCACTGGGAGCTGAA                           |
| 2DS3 - #1 right  | AACTGATAGGGGGAGTGAGGAACAGAGACCGTCTAGATTGGATCTTGCTGGCAC                           |
| 2DS3 - #2 left   | GGGTTCCCTAAGGGTTGGACCGAAAGACCCGAAGCATCTGTAGTTCTCTCT                              |
| 2DS3 - #2 right  | TGGGTGGCAGGGCCAGAGAAAGTCGGCCTGGAATGTCTAGATTGGATCTTGCTGGCAC                       |

**Table S1 continued**  
**Overview probe sequences of the KIR MLPA technique.**

| <b>Probe</b>         | <b>Sequence (5'-3')</b>                                                        |
|----------------------|--------------------------------------------------------------------------------|
| 2DS4 - All left      | GGGTTCCCTAAGGGTTGGACTCCCCTCTCTGTGCAGAAGGAAGTCTCAAACATGACATCC                   |
| 2DS4 - All right     | GACCAACATTGCAGGATGACTGTCTCTTCTGATTTACCAGGTGACCTGGGAGTCTAGATTGGATCTTGCTGGCAC    |
| 2DS4 - WT/trunc left | GGGTTCCCTAAGGGTTGGACTTGGGCCAGAGGAAAGTCRGCCTGGAATGTTCCGKGTAT                    |
| 2DS4 - trunc middle  | GCTGCGCACTGCAGGGAGCCTACGTTTCATGGGCCTCCCCYTCCCTGGATAG                           |
| 2DS4 - trunc right   | ATGGAGCTGCAGGACAAGGTACAGTCTAGATTGGATCTTGCTGGCAC                                |
| 2DS4 - WT middle     | GCTGCGCACTGCAGGGAGCCTACGTTTCATGGGCCTCCCCYTCCCTGGATAGATGGTAC                    |
| 2DS4 - WT right      | CATGTCATAGGAGCTCCGGGAGCTGCAGGACAAGWCACATTCTCTCTAGATTGGATCTTGCTGGCAC            |
| 2DS5 left            | GGGTTCCCTACGGGTTGGACCGAGTAAACCGGAAAATTTTCATCTGCACAGAGAGGGGACGTTAAC             |
| 2DS5 middle          | CACACTTTGCCCTCATTGGAGAGCACATTGATGGGGTCTCCAAGGG                                 |
| 2DS5 right           | CAACTTCTCCCTCGGTGCGATGACACAAGACCTGGCATAGCGAATACGTCTAGATTGGATCTTGCTGGCAC        |
| 3DL1 - #1 left       | GGGTTCCCTAAGGGTTGGACCCCTCAHGCCTCGYTGGACA                                       |
| 3DL1 - #1 middle     | GATCCATGATGGGGTCTCCAAGGCCAATTTCTCCATCGGTCCCATGATGCT                            |
| 3DL1 - #2 left       | GGGTTCCCTAAGGGTTGGACTCAGCTCAGGTATGAGGGGAGCTATGACAAGGAAGAACCT                   |
| 3DL1 - #2 middle     | CCCTGAGGAAACTGCCTCTTCTCCTTCCAGGTCC                                             |
| 3DL1 - #2 right      | ATATGAGAAACCTTCTCTCAGCCAGCCGGGTCTAGATTGGATCTTGCTGGCAC                          |
| 3DL1/S1 right        | TGCCCTTGACGGGACCTACAGATGCTACGGTCTGGTCTAGATTGGATCTTGCTGGCAC                     |
| 3DL2 - #1 left       | GGGTTCCCTAAGGGTTGGAATCCACCCTAAGGTTTGGGGAKGGACTCACCCATGA                        |
| 3DL2 - #1 right      | GTGGCCAGGCCCCCTGCAGCAAGAAGAACCCTGTCTAGATTGGATCTTGCTGGCGC                       |
| 3DL2 - #2 left       | GGGTTCCCTAAGGGTTGGACCATGAAGCTCCTCAGCTATGGCTCTAGGATCATAAGACATGGGACAGACA         |
| 3DL2 - #2 middle     | CGGGTTTTCTCACCTGTGACAGAAACAAGCAGTGGGTCACCTTGAGTTTGACCACACGCA                   |
| 3DL2 - #2 right      | GGGCAGGGCACGAAAGAGCCGAAGCATCTGTAGTTCCCTCGTCTAGATTGGATCTTGCTGGCAC               |
| 3DL3 - #1 left       | GGGTTCCCTACGGGTTGGATAGATGCTTCGGCTCTTCCGTGCCCTGCC                               |
| 3DL3 - #1 right      | CAYGCGTGGTCAGACCCGAGTGACCCGTCTAGATTGGATCTTGCTGGCAC                             |
| 3DL3 - #2 left       | GGGTTCCCTAAGGGTTGGACAAGGGTGAGAGGCAGGTCTGTATTCTCTCACCTA                         |
| 3DL3 - #2 middle     | CGACCACGATGTCCAGAGGGTCACTGGGAGCYGACAACCTCATAGGGTA                              |
| 3DL3 - #2 right      | AGTGAGTGACAGAACCAAAGCATCTGTAGTCTAGATTGGATCTTGCTGGCAC                           |
| 3DP1 - #1 left       | GGGTTCCCTAAGGGTTGGACACCATGATCACCAGGGGGTCTGGGTGCTGACCACCCAGTGAGGA               |
| 3DP1 - #1 right      | AGTGTGGGTGTGAACCCGACATCTGTAGTCCCTGTCTAGATTGGATCTTGCTGGCGC                      |
| 3DP1 - #2 left       | GGGTTCCCTAAGGGTTGGACGCTGAGGCCTGAAAGGAATAGAGGGAGGGAGTGCCACATC                   |
| 3DP1 - #2 right      | CTCCTCTCTAAGGTGGCGCCTCTTCTCCCCAGGTGTCTAGATTGGATCTTGCTGGCAC                     |
| 3DS1 - #1 left       | GGGTTCCCTAAGGGTTGGACTTGTTCATCAGAATCCTGGAGAGAGGAAATGCTGAGTGAGGGAGGGTGCACATTTTTC |
| 3DS1 - #1 middle     | AGGACTCTTTGGGAATAACACTAGCCACGAGGCTGGGCCAGGAGCACCTACCTCGCTGTTTAC                |
| 3DS1 - #1 right      | TTCTGTTCCCTGCAGGCTCTTGGTCCATTACAGCAGCATCTGTAGGAGACGTCTAGATTGGATCTTGCTGGCGC     |
| 3DS1 - #2 left       | GGGTTCCCTAAGGGTTGGACACTTCTTCTGCACAAAGAGTGGATCTCTAAGG                           |
| 3DS1 - #2 middle     | ACCCCTCAGCCTCGTTGGACAGATCCATGATGGGGTCTCCAAGGCCAATTTCTCCATCGGTCCATGATGCG        |
