# Supplementary material for: Extensive Variation in Gene Copy Number at the Killer Immunoglobulin-Like Receptor Locus in Humans
Source: PubMed Central journal article supplement (PMC3695908; doi:10.1371/journal.pone.0067619), 2013-06-28
Supplement: pone.0067619.s006.pdf [file pone.0067619.s006.pdf]

**Table S2**  
**Overview control probe sequences of the KIR MLPA technique.**

| <b>Probe</b>        | <b>Sequence (5'-3')</b>                                                      |
|---------------------|------------------------------------------------------------------------------|
| Control 1 - left    | GGGTTCCCTAAGGGTTGGACCAGCCAGCAGCAGCCCCAAGCTGATAAGATTAATCTAAAGAGCAAATTATGGT    |
| Control 1 - middle  | GTAATTTCTATGCTGAAACTTTGTAGTTAATTTTTTAAAAAGGTTTCATTTTCTATTGGTCTGATTT          |
| Control 1 - right   | CACAGGAACATTTTACCTGTTTGTGAGGCATTTTTTCTCCTGGTCTAGATTGGATCTTGCTGGCAC           |
| Control 2 - left    | GGGTTCCCTAAGGGTTGGATAGAGGGCTCCAGGTTATCCGGGCTC                                |
| Control 2 - right   | TGCTTCTGCCGCCGCCGTCGGGGTCTAGATTGGATCTTGCTGGCAC                               |
| Control 3 - left    | GGGTTCCCTAAGGGTTGGATTCAGGAGTGATACTTCACAGATCCTGGAGGAA                         |
| Control 3 - right   | AACATCCCAGTCCTTAAGGCCAAACTGAGTCTAGATTGGATCTTGCTGGCAC                         |
| Control 4 - left    | GGGTTCCCTAAGGGTTGGACTGCGTGAGACCAAGCGCCGTCATGAGACCCGACTGGTG                   |
| Control 4 - right   | GAGATTGACAATGGGAAGCAGCGTGAGTTTGAGAGTCTAGATTGGATCTTGCTGGCAC                   |
| Control 8 - left    | GGGTTCCCTAAGGGTTGGACCTGCTCCCAGTAGGGTCAGCATCTGGACCCAGGCTGA                    |
| Control 8 - middle  | GAGTCAGGCTCTGATTCCAGATCTAGCCTCCATCATGAAGAAGCTCTTGACCAAGTATG                  |
| Control 8 - right   | ACAACCTCTTTGAGACGTCCTTTCCCTACTCCATGTCTAGATTGGATCTTGCTGGCAC                   |
| Control 9 - left    | GGGTTCCCTAAGGGTTGGACGCAGGACAGAAGGAGCAAGCTGTGGAATGGTATAAGAAAG                 |
| Control 9 - middle  | GTATTGAAGAACTGGAAGAAGGAATAGCTGTTATAGTTACAGGACAAGGTAAGATTGTAT                 |
| Control 9 - right   | TTGTTTATAGCCATCCCAAATTATGATATATTCACACTCTAGATTGGATCTTGCTGGCAC                 |
| Control 10 - left   | GGGTTCCCTAAGGGTTGGACCTTCCCATTGGTTTGTATTGCAGATGAAGTGGAAAGGGAAGGACCTCTTTGATTTG |
| Control 10 - middle | GTGTGCCGACTCTGGGGCTCCGAGAAACCTGGTTCTTTGGACTGCAGTACACAATCAAGGACACAGTG         |
| Control 10 - right  | GCCTGGCTCAAATGGACAAGAAGGTTGGGCTAGAACTCGATGAAACTGGTGCTCTAGATTGGATCTTGCTGGCAC  |
