# Supplementary material for: Extensive Variation in Gene Copy Number at the Killer Immunoglobulin-Like Receptor Locus in Humans
Source: PubMed Central journal article supplement (PMC3695908; doi:10.1371/journal.pone.0067619), 2013-06-28
Supplement: pone.0067619.s007.pdf [file pone.0067619.s007.pdf]

**Table S3**  
**KIR MLPA technique probe distribution over 3 mixes.**

| Mix 1                |                | Mix 2                |                | Mix 3            |                | KIR controls        |        |                |
|----------------------|----------------|----------------------|----------------|------------------|----------------|---------------------|--------|----------------|
| Probe                | Product Length | Probe                | Product Length | Probe            | Product Length | Probe               | Target | Product Length |
| 2DL1 - #1 left       | 190            | 2DL1 - #2 left       | 97             | 2DL1 - #2 left   | 97             | Control 1 - left    | IL-4   | 208            |
| 2DL1 - #1 middle     |                | 2DL1 - #2 right      |                | 2DL1 - #2 right  |                | Control 1 - middle  |        |                |
| 2DL1 - #1 right      |                | 2DL2 - #2 left       | 145            | 2DL3 - #2 left   | 214            | Control 1 - right   |        |                |
| 2DL2 - #1 left       | 96             | 2DL2 - #2 right      |                | 2DL3 - #2 middle |                | Control 2 - left    | FGF3   | 92             |
| 2DL2 - #1 right      |                | 2DL3 - #1 left       | 204            | 2DL3 - #2 right  |                | Control 2 - right   |        |                |
| 2DL3 - #1 left       | 204            | 2DL3 - #1 middle     |                | 2DL4 - #1 left   | 170            | Control 3 - left    | BCAS4  | 104            |
| 2DL3 - #1 middle     |                | 2DL3 - #1 right      |                | 2DL4 - #1 middle |                | Control 3 - right   |        |                |
| 2DL3 - #1 right      |                | 2DL3 - #2 left       | 214            | 2DL4 - #1 right  |                | Control 4 - left    | LMNA   | 116            |
| 2DL4 - #1 left       | 170            | 2DL3 - #2 middle     |                | 2DL5b left       | 229            | Control 4 - right   |        |                |
| 2DL4 - #1 middle     |                | 2DL3 - #2 right      |                | 2DL5b middle     |                | Control 8 - left    | GALT   | 175            |
| 2DL4 - #1 right      |                | 2DL4 - #2 left       | 218            | 2DL5b right      |                | Control 8 - middle  |        |                |
| 2DL5 - #1 left       | 142            | 2DL4 - #2 middle     |                | 2DP1 - #1 left   | 121            | Control 8 - right   |        |                |
| 2DL5 - #1 middle     |                | 2DL4 - #2 right      |                | 2DP1 - #1 right  |                | Control 9 - left    | SPG4   | 180            |
| 2DL5 - #1 right      |                | 2DL5 - #2 left       | 108            | 2DS1 - #2 left   | 134            | Control 9 - middle  |        |                |
| 2DP1 - #1 left       | 121            | 2DL5 - #2 right      |                | 2DS1 - #2 middle |                | Control 9 - right   |        |                |
| 2DP1 - #1 right      |                | 2DL5b left           | 229            | 2DS1 - #2 right  |                | Control 10 - left   | NF2    | 223            |
| 2DS1 - #1 left       | 195            | 2DL5b middle         |                | 2DS3 - #1 left   | 108            | Control 10 - middle |        |                |
| 2DS1 - #1 middle     |                | 2DL5b right          |                | 2DS3 - #1 right  |                | Control 10 - right  |        |                |
| 2DS1 - #1 right      |                | 2DP1 - #2 left       | 125            | 2DS5 left        | 185            |                     |        |                |
| 2DS3 - #1 left       | 108            | 2DP1 - #2 right      |                | 2DS5 middle      |                |                     |        |                |
| 2DS3 - #1 right      |                | 2DS1 - #2 left       | 134            | 2DS5 right       |                |                     |        |                |
| 2DS4 - All left      | 137            | 2DS1 - #2 middle     |                | 3DL1 - #1 left   | 150            |                     |        |                |
| 2DS4 - All right     |                | 2DS1 - #2 right      |                | 3DL1 - #1 middle |                |                     |        |                |
| 2DS4 - WT/trunc left | 160            | 2DS2 left            | 101            | 3DL1/S1 right    |                |                     |        |                |
| 2DS4 - trunc middle  |                | 2DS2 right           |                | 3DL3 - #1 left   | 100            |                     |        |                |
| 2DS4 - trunc right   |                | 2DS3 - #2 left       | 112            | 3DL3 - #1 right  |                |                     |        |                |
| 2DS5 left            | 185            | 2DS3 - #2 right      |                | 3DP1 - #2 left   | 121            |                     |        |                |
| 2DS5 middle          |                | 2DS4 - WT/trunc left | 190            | 3DP1 - #2 right  |                |                     |        |                |
| 2DS5 right           |                | 2DS4 - WT middle     |                |                  |                |                     |        |                |
| 3DL1 - #1 left       | 150            | 2DS4 - WT right      |                |                  |                |                     |        |                |
| 3DL1 - #1 middle     |                | 3DL1 - #2 left       | 150            |                  |                |                     |        |                |
| 3DL1/S1 right        |                | 3DL1 - #2 middle     |                |                  |                |                     |        |                |
| 3DL2 - #1 left       | 111            | 3DL1 - #2 right      |                |                  |                |                     |        |                |
| 3DL2 - #1 right      |                | 3DL2 - #2 left       | 195            |                  |                |                     |        |                |
| 3DL3 - #1 left       | 100            | 3DL2 - #2 middle     |                |                  |                |                     |        |                |
| 3DL3 - #1 right      |                | 3DL2 - #2 right      |                |                  |                |                     |        |                |
| 3DP1 - #1 left       | 125            | 3DL3 - #2 left       | 154            |                  |                |                     |        |                |
| 3DP1 - #1 right      |                | 3DL3 - #2 middle     |                |                  |                |                     |        |                |
| 3DS1 - #1 left       | 219            | 3DL3 - #2 right      |                |                  |                |                     |        |                |
| 3DS1 - #1 middle     |                | 3DP1 - #2 left       | 121            |                  |                |                     |        |                |
| 3DS1 - #1 right      |                | 3DP1 - #2 right      |                |                  |                |                     |        |                |
|                      |                | 3DS1 - #2 left       | 185            |                  |                |                     |        |                |
|                      |                | 3DS1 - #2 middle     |                |                  |                |                     |        |                |
|                      |                | 3DL1/S1 right        |                |                  |                |                     |        |                |
