# Supplementary material for: Extensive Variation in Gene Copy Number at the Killer Immunoglobulin-Like Receptor Locus in Humans
Source: PubMed Central journal article supplement (PMC3695908; doi:10.1371/journal.pone.0067619), 2013-06-28
Supplement: pone.0067619.s008.pdf [file pone.0067619.s008.pdf]

**Table S4**  
**Copy number determination by KIR MLPA technique.**

| <b>Gene detected</b> | <b>Determining CNV</b>                          |
|----------------------|-------------------------------------------------|
| 2DL1                 | Average of all probes                           |
| 2DL2                 | Average of all probes                           |
| 2DL3                 | Average of #2 in Mix 2 and 3                    |
| 2DL4                 | Average of all probes                           |
| 2DL5 *               | 2DL5 #2 in Mix 2                                |
| 2DS1                 | Average of #2 multiplied by 2 in Mix 2 and 3    |
| 2DS2                 | 2DS2 in Mix 2                                   |
| 2DS3                 | Average 2DS3 #2 in Mix 2 and 2DS3 #1 in Mix 3   |
| 2DS4 All             | 2DS4 All and independently copies of WT + trunc |
| 2DS4 WT              | 2DS4 WT                                         |
| 2DS4 truncated       | 2DS4 trunc multiplied by 2                      |
| 2DS5                 | Average of all probes                           |
| 2DP1                 | Average of all probes                           |
| 3DL1                 | Average of 3DL1 #1 in Mix 1 and 3               |
| 3DL2                 | Average of all probes                           |
| 3DL3                 | Average of all probes                           |
| 3DS1                 | Average of all probes                           |
| 3DP1                 | 3DP1 #1 in Mix1                                 |

\* Detects both 2DL5A and B
