# Supplementary material for: Extensive Variation in Gene Copy Number at the Killer Immunoglobulin-Like Receptor Locus in Humans
Source: PubMed Central journal article supplement (PMC3695908; doi:10.1371/journal.pone.0067619), 2013-06-28
Supplement: pone.0067619.s010.pdf [file pone.0067619.s010.pdf]

**Table S6**  
**KIR gene copy number distribution in a cohort of healthy individuals.**

| KIR Gene         | Copies |       |       |       |      |
|------------------|--------|-------|-------|-------|------|
|                  | 0      | 1     | 2     | 3     | >3   |
| <b>2DL1</b>      | 4.2%   | 21.7% | 62.5% | 11.7% | 0.0% |
| <b>2DL2</b>      | 46.7%  | 45.8% | 7.5%  | 0.0%  | 0.0% |
| <b>2DL3</b>      | 12.5%  | 51.7% | 35.0% | 0.8%  | 0.0% |
| <b>2DL4</b>      | 0.0%   | 3.3%  | 88.3% | 8.3%  | 0.0% |
| <b>2DL5</b>      | 43.7%  | 39.5% | 16.0% | 0.8%  | 0.0% |
| <b>2DS1</b>      | 62.5%  | 31.7% | 5.8%  | 0.0%  | 0.0% |
| <b>2DS2</b>      | 46.2%  | 49.6% | 4.2%  | 0.0%  | 0.0% |
| <b>2DS3</b>      | 68.3%  | 26.7% | 5.0%  | 0.0%  | 0.0% |
| <b>2DS4all</b>   | 3.4%   | 26.9% | 68.1% | 1.7%  | 0.0% |
| <b>2DS4wt</b>    | 60.8%  | 32.5% | 6.7%  | 0.0%  | 0.0% |
| <b>2DS4trunc</b> | 18.3%  | 50.0% | 30.8% | 0.8%  | 0.0% |
| <b>2DS5</b>      | 66.7%  | 32.5% | 0.8%  | 0.0%  | 0.0% |
| <b>2DP1</b>      | 4.2%   | 24.2% | 58.3% | 13.3% | 0.0% |
| <b>3DL1</b>      | 3.3%   | 34.2% | 59.2% | 3.3%  | 0.0% |
| <b>3DL2</b>      | 0.0%   | 0.0%  | 99.2% | 0.8%  | 0.0% |
| <b>3DL3</b>      | 0.0%   | 0.0%  | 99.2% | 0.8%  | 0.0% |
| <b>3DS1</b>      | 58.3%  | 17.5% | 20.0% | 4.2%  | 0.0% |
| <b>3DP1</b>      | 0.0%   | 15.0% | 84.2% | 0.8%  | 0.0% |

n=120
