# Supplementary material for: Extensive Variation in Gene Copy Number at the Killer Immunoglobulin-Like Receptor Locus in Humans
Source: PLoS One. 2013 Jun 28;8(6):e67619. doi: 10.1371/journal.pone.0067619 (PMC3695908; doi:10.1371/journal.pone.0067619)
Supplement: Table S5 — A sequence alignment of the short tandem repeat region in intron 4 of most KIRs. (PDF) [file pone.0067619.s009.pdf]

**A sequence alignment of the short tandem repeat region in intron 4 of most KIRs.**

\*\*\*\*\* \* \*\* \*
